# Supplementary material
Source: PubMed Central journal article supplement (PMC2954748)
Supplement: blood-2008-05-154013_1.pdf [file blood-2008-05-154013_1.pdf]

| Characteristic           | Total cases | Wildtype (%) | Mutation (%) | P-value | Test used      |
|--------------------------|-------------|--------------|--------------|---------|----------------|
| <b>All patients</b>      | 172         | 160 (93)     | 12 (7)       |         |                |
| <b>Gender</b>            |             |              |              | 0.76    | Fisher's exact |
| Male                     | 89          | 84 (94)      | 5 (6)        |         |                |
| Female                   | 81          | 75 (93)      | 6 (7)        |         |                |
| missing                  | 2           | 1            | 1            |         |                |
| <b>Age</b>               |             |              |              | 0.02    | T-test         |
| Mean (SD)                | 52 (14.5)   | 51 (14.5)    | 62 (10.5)    |         |                |
| 60 and under             | 116         | 112 (97)     | 4 (3)        |         |                |
| Over 60 years            | 55          | 48 (87)      | 7 (13)       |         |                |
| missing                  | 1           | 0            | 1            |         |                |
| <b>Tumour grade</b>      |             |              |              | 0.03    | Mann-Whitney U |
| I                        | 71          | 70 (99)      | 1 (1)        |         |                |
| II                       | 56          | 49 (87)      | 7 (13)       |         |                |
| III (a or b)             | 39          | 35 (90)      | 4 (10)       |         |                |
| missing                  | 6           | 6            | 0            |         |                |
| <b>LDH (Ratio)</b>       |             |              |              | 0.93    | Mann-Whitney U |
| Median                   | 0.96        | 0.96         | 0.74         |         |                |
| (Interquartile range)    | (0.73,1.18) | (0.73,1.18)  | (0.70,1.47)  |         |                |
| <b>Stage</b>             |             |              |              | 0.95    | Mann-Whitney U |
| I / Ie                   | 18          | 18 (100)     | 0 (0)        |         |                |
| II / Iie                 | 29          | 26 (90)      | 3 (10)       |         |                |
| III / IIIe               | 56          | 52 (93)      | 4 (7)        |         |                |
| IV                       | 67          | 63 (94)      | 4 (6)        |         |                |
| missing                  | 2           | 1            | 1            |         |                |
| <b>IPI</b>               |             |              |              | 0.04    | Mann-Whitney U |
| Median                   | 1(1,2)      | 1(1,2)       | 2 (1,3)      |         |                |
| (Interquartile range)    |             |              |              |         |                |
| Low (0-2)                | 138         | 132 (96)     | 6 (4)        |         |                |
| High (3-5)               | 26          | 22 (85)      | 4 (15)       |         |                |
| missing                  | 8           | 6            | 2            |         |                |
| <b>B-symptoms</b>        |             |              |              | 0.45    | Fisher's exact |
| Absent                   | 137         | 129 (94)     | 8 (6)        |         |                |
| Present                  | 33          | 30 (91)      | 3 (9)        |         |                |
| missing                  | 2           | 1            | 1            |         |                |
| <b>BM infiltration</b>   |             |              |              | 0.37    | Fisher's exact |
| Absent                   | 105         | 96 (91)      | 9 (9)        |         |                |
| Present                  | 67          | 64 (96)      | 3 (4)        |         |                |
| <b>Transformation</b>    |             |              |              | 1.00    | Fisher's Exact |
| None                     | 103         | 95 (92)      | 8 (8)        |         |                |
| Clinical                 | 12          | 11 (92)      | 1 (8)        |         |                |
| Pathological             | 27          | 25 (93)      | 2 (7)        |         |                |
| missing                  | 30          | 29           | 1            |         |                |
| <b>Initial Treatment</b> |             |              |              | 0.23    | Fisher's Exact |
| Expectant management     | 17          | 16 (94)      | 1 (6)        |         |                |
| Chemotherapy             | 107         | 102 (95)     | 5 (5)        |         |                |
| Radiotherapy             | 15          | 13 (87)      | 2 (13)       |         |                |
| both                     | 32          | 28 (87)      | 4 (13)       |         |                |
| missing                  | 1           | 1            | 0            |         |                |
